# Supplementary material for: A theoretical study of complexes formed between cations and curved aromatic systems: electrostatics does not always control cation–π interaction
Source: Royal Society of Chemistry journal article supplement (doi:10.1039/c7cp01491k), 2017-01-01
Supplement: c7cp01491k1.pdf [file c7cp01491k1.pdf]

# Theoretical study of complexes formed between cations and curved aromatic systems: electrostatics does not always control cation- $\pi$ interaction

Authors: **Jorge A. Carrazana-García**<sup>1</sup>, **Enrique M. Cabaleiro-Lago**<sup>1</sup>, **Jesús Rodríguez-Otero**<sup>2</sup>

<sup>1</sup> *Departamento de Química Física, Facultade de Ciencias, Universidade de Santiago de Compostela. Campus de Lugo. Avenida Alfonso X El Sabio s/n, Lugo 27002, Spain.*

<sup>2</sup> *Centro de investigación en Química Biolóxica e Materiais Moleculares, CIQUS, Universidade de Santiago de Compostela, Rúa Jenaro de la Fuente s/n, Santiago de Compostela, 15782, Spain.*

**Keywords:** non-covalent interactions, cation- $\pi$  interaction, interaction energy analysis

## *Supplementary information TOC:*

### Pag. 2:

- **Fig. ESI 1.** Plot of the Molecular Electrostatic Potential as function of the Molecular bowl – cation (Mb $\cdots$ M) distance, computed in the directions normal to the different rings of Sumanene and Corannulene.
- **Table ESI 1.** Interaction energy in the minima of the Mb $\cdots$ M scans of the complexes studied, computed at the levels of calculation: MP2.X, SCS-MP2/CBS and M06-2X/6-31+G\*.

### Pag. 3:

- **Table ESI 2.** Eint of the minima found in the MP2.X scans, grouped by cation/orientation and ordered by stability.
- **Table ESI 3.** Ionization potential and HOMO energies of the fragments of the cation- $\pi$  complexes studied, computed at the PBE/aVDZ level of calculation.
- **Note on the acronyms used** for labelling the complexes.

### Pag. 4:

- **Table ESI 4** and **Table ESI 5.** Interaction energies and their contributions (Repulsion, Electrostatic, Polarization and Dispersion) evaluated through SAPT(DFT): PBE/aVDZ calculations, for the 103 cation- $\pi$  complexes studied.

### Pag. 5:

- **Fig. ESI 2** and **Fig. ESI 3.** Bar graphs with the relative contributions (expressed in %) of Electrostatic, Polarization and Dispersion to the stabilization of the 103 complexes studied.

### Pag. 6:

- **Table ESI 6.** Interaction energies of selected complexes, computed at the minima of the MP2.X scans using two different DFT methods: M06-2X/6-31+G\* and PBE/6-31+G\*.

### Pag. 7:

- Cartesian coordinates of the polyatomic fragments used in the study, optimized at the M06-2X/6-31+G\* level of calculation.

**Fig. ESI 1.** Molecular Electrostatic Potential in the directions normal to the rings of Sumanene and Corannulene (see Fig. 1 in the body of the paper) computed at the riMP2/aVDZ level of calculation

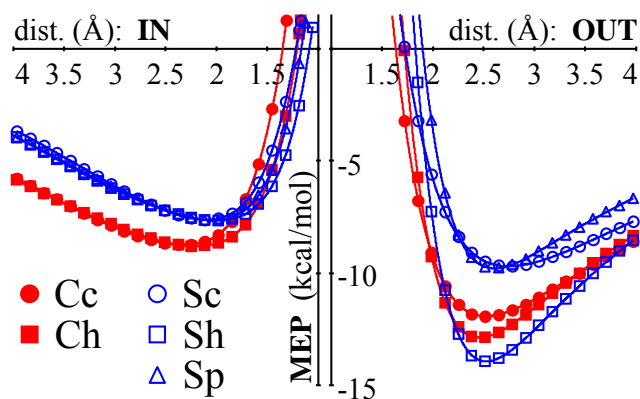

**Table ESI 1.**  $E_{int}$  (in kcal/mol) in the minima of the Mb $\cdots$ M scans computed at the levels of calculation: X = MP2.X; S = SCS-MP2/CBS; M = M062X/6-31+G\*.

|                    |                      | Mb = Corannulene |       |        |        | Mb = Sumanene |        |        |        |        |        |        |        |        |
|--------------------|----------------------|------------------|-------|--------|--------|---------------|--------|--------|--------|--------|--------|--------|--------|--------|
|                    |                      | M                | level | Cc in  | Cc out | Ch in         | Ch out | Sc in  | Sc out | Sh in  | Sh out | Sp in  | Sp out |        |
| monoatomic cations | N                    | X                |       | -28.46 | -28.37 | -27.66        | -27.98 | -28.95 | -27.74 | -27.51 | -29.79 | -26.57 | -22.50 |        |
|                    |                      | S                |       | -28.30 | -28.85 | -27.55        | -28.17 | -28.55 | -28.12 | -27.06 | -29.71 | -26.24 | -22.68 |        |
|                    |                      | M                |       | -31.66 | -31.06 | -30.97        | -30.91 | -32.73 | -30.94 | -30.98 | -32.98 | -29.84 | -24.90 |        |
|                    | K                    | X                |       | -27.09 | -23.64 | -25.00        | -22.83 | -27.19 | -23.10 | -24.31 | -23.98 | -24.40 | -18.23 |        |
|                    |                      | S                |       | -26.25 | -23.49 | -24.22        | -22.43 | -26.11 | -23.08 | -23.37 | -23.47 | -23.46 | -17.90 |        |
|                    |                      | M                |       | -27.37 | -24.28 | -25.22        | -23.35 | -27.38 | -23.74 | -24.52 | -24.42 | -24.61 | -18.43 |        |
|                    | tetrahedral cations  | A1               | X     |        | -26.72 | -22.71        |        | -22.26 | -27.07 | -21.73 |        | -23.38 |        | -17.88 |
|                    |                      |                  | S     |        | -25.87 | -22.75        |        | -21.97 | -26.07 | -21.81 |        | -22.96 |        | -17.64 |
|                    |                      |                  | M     |        | -26.44 | -22.66        |        | -22.15 | -27.31 | -21.96 |        | -23.26 |        | -17.72 |
| A2                 |                      | X                |       | -28.63 | -24.32 |               | -23.75 | -28.35 | -24.04 |        | -24.69 |        | -17.28 |        |
|                    |                      | S                |       | -27.60 | -24.08 |               | -23.24 | -27.29 | -23.88 |        | -24.08 |        | -16.84 |        |
|                    |                      | M                |       | -28.57 | -24.62 |               | -23.94 | -28.62 | -24.57 |        | -24.95 |        | -17.13 |        |
| A3                 |                      | X                |       | -29.30 | -23.43 |               | -21.94 | -30.86 | -23.81 |        | -23.26 |        | -17.96 |        |
|                    |                      | S                |       | -28.22 | -23.15 |               | -21.54 | -29.65 | -23.60 |        | -22.68 |        | -17.54 |        |
|                    |                      | M                |       | -29.58 | -23.96 |               | -22.34 | -31.27 | -24.53 |        | -23.66 |        | -18.28 |        |
| T1                 |                      | X                |       | -16.43 | -12.30 |               | -10.98 | -16.47 | -12.05 |        | -11.11 |        | -9.27  |        |
|                    |                      | S                |       | -15.34 | -12.03 |               | -10.58 | -15.08 | -11.78 |        | -10.61 |        | -8.84  |        |
|                    |                      | M                |       | -15.89 | -11.55 |               | -10.29 | -16.22 | -11.31 |        | -10.39 |        | -8.65  |        |
| T2                 |                      | X                |       | -17.29 | -14.26 |               | -12.15 | -15.69 | -13.73 |        | -12.22 |        | -9.43  |        |
|                    |                      | S                |       | -15.97 | -13.97 |               | -11.64 | -14.09 | -13.52 |        | -11.64 |        | -8.97  |        |
|                    |                      | M                |       | -16.47 | -13.43 |               | -11.14 | -14.93 | -12.91 |        | -11.39 |        | -8.45  |        |
| T3                 |                      | X                |       | -16.99 | -15.24 |               | -13.24 | -15.71 | -14.72 |        | -13.38 |        | -11.89 |        |
|                    |                      | S                |       | -15.64 | -15.07 |               | -12.83 | -14.09 | -14.53 |        | -12.78 |        | -11.42 |        |
|                    |                      | M                |       | -16.08 | -14.13 |               | -12.17 | -14.84 | -13.62 |        | -12.24 |        | -11.14 |        |
| flat cations       | G1<br><i>T-shap.</i> | X                |       | -19.37 | -15.41 |               | -14.48 | -18.59 | -14.79 |        | -15.06 |        | -10.03 |        |
|                    |                      | S                |       | -18.37 | -15.19 |               | -14.11 | -17.72 | -14.83 |        | -14.60 |        | -9.78  |        |
|                    |                      | M                |       | -18.70 | -15.12 |               | -14.24 | -18.21 | -14.60 |        | -14.76 |        | -9.39  |        |
|                    | G2<br><i>T-shap.</i> | X                |       | -20.04 | -19.16 |               | -17.79 | -18.77 | -18.16 |        | -18.66 |        | -11.12 |        |
|                    |                      | S                |       | -19.03 | -18.99 |               | -17.38 | -17.62 | -18.11 |        | -18.10 |        | -10.79 |        |
|                    |                      | M                |       | -19.29 | -18.12 |               | -16.81 | -18.27 | -17.31 |        | -17.71 |        | -9.89  |        |
|                    | G3<br><i>stacked</i> | X                |       | -19.44 | -15.11 |               | -13.04 | -15.20 | -14.12 |        | -11.96 |        | -11.67 |        |
|                    |                      | S                |       | -18.27 | -15.08 |               | -12.65 | -13.74 | -14.13 |        | -11.56 |        | -11.30 |        |
|                    |                      | M                |       | -19.99 | -15.27 |               | -13.03 | -15.18 | -13.91 |        | -11.69 |        | -11.84 |        |
|                    | I2<br><i>T-shap.</i> | X                |       | -21.35 | -17.66 | -20.08        | -15.80 | -20.66 | -17.28 | -19.62 | -16.63 | -19.07 | -10.41 |        |
|                    |                      | S                |       | -21.04 | -17.96 | -19.87        | -15.74 | -20.28 | -17.67 | -19.32 | -16.44 | -18.76 | -10.31 |        |
|                    |                      | M                |       | -20.15 | -17.06 | -19.00        | -15.01 | -19.84 | -16.79 | -18.85 | -15.99 | -18.40 | -9.37  |        |
|                    | I5<br><i>stacked</i> | X                |       | -20.61 | -15.49 | -21.83        | -13.04 | -18.45 | -14.85 | -20.47 | -12.25 | -20.90 | -11.99 |        |
|                    |                      | S                |       | -21.03 | -16.31 | -22.09        | -13.48 | -18.44 | -15.73 | -20.29 | -12.60 | -20.64 | -12.16 |        |
|                    |                      | M                |       | -21.36 | -14.98 | -22.27        | -12.50 | -18.82 | -14.46 | -20.60 | -11.73 | -21.07 | -11.45 |        |

**Table ESI 2.**  $E_{\text{int}}$  (in kcal/mol) in the minima of the scans performed at the MP2.X level of calculation organized in descending order of stability. Labels for the **outer** complexes are in **red** color and for the **inner** complexes in **blue**. As a reference, the values of the molecular electrostatic potential (in kcal/mol) in the minima of Fig. 3 are also included in the first line.

| MEP                 |                      | Sh o  | Ch o  | Cc o  | Sp o  | Sc o  | Ch i  | Cc i  | Sh i  | Sp i  | Sc i  |
|---------------------|----------------------|-------|-------|-------|-------|-------|-------|-------|-------|-------|-------|
|                     |                      | -13.9 | -12.9 | -11.9 | -9.8  | -9.7  | -8.8  | -8.8  | -7.7  | -7.7  | -7.6  |
| monoatomic cations  | N                    | Sh o  | Sc i  | Cc i  | Cc o  | Ch o  | Sc o  | Ch i  | Sh i  | Sp i  | Sp o  |
|                     |                      | -29.8 | -29.0 | -28.5 | -28.4 | -28.0 | -27.7 | -27.7 | -27.5 | -26.6 | -22.5 |
|                     | K                    | Sc i  | Cc i  | Ch i  | Sp i  | Sh i  | Sh o  | Cc o  | Sc o  | Ch o  | Sp o  |
|                     |                      | -27.2 | -27.1 | -25.0 | -24.4 | -24.3 | -24.0 | -23.6 | -23.1 | -22.8 | -18.2 |
| tetrahedral cations | A1                   |       |       |       | Sc i  | Cc i  | Sh o  | Cc o  | Ch o  | Sc o  | Sp o  |
|                     |                      |       |       |       | -27.1 | -26.7 | -23.4 | -22.7 | -22.3 | -21.7 | -17.9 |
|                     | A2                   |       |       |       | Cc i  | Sc i  | Sh o  | Cc o  | Sc o  | Ch o  | Sp o  |
|                     |                      |       |       |       | -28.6 | -28.3 | -24.7 | -24.3 | -24.0 | -23.8 | -17.3 |
|                     | A3                   |       |       |       | Sc i  | Cc i  | Sc o  | Cc o  | Sh o  | Ch o  | Sp o  |
|                     |                      |       |       |       | -30.9 | -29.3 | -23.8 | -23.4 | -23.3 | -21.9 | -18.0 |
|                     | T1                   |       |       |       | Sc i  | Cc i  | Cc o  | Sc o  | Sh o  | Ch o  | Sp o  |
|                     |                      |       |       | -16.5 | -16.4 | -12.3 | -12.0 | -11.1 | -11.0 | -9.3  |       |
|                     | T2                   |       |       |       | Cc i  | Sc i  | Cc o  | Sc o  | Sh o  | Ch o  | Sp o  |
|                     |                      |       |       |       | -17.3 | -15.7 | -14.3 | -13.7 | -12.2 | -12.2 | -9.4  |
|                     | T3                   |       |       |       | Cc i  | Sc i  | Cc o  | Sc o  | Sh o  | Ch o  | Sp o  |
|                     |                      |       |       |       | -17.0 | -15.7 | -15.2 | -14.7 | -13.4 | -13.2 | -11.9 |
| flat cations        | G1<br><i>T-shap.</i> |       |       |       | Cc i  | Sc i  | Cc o  | Sh o  | Sc o  | Ch o  | Sp o  |
|                     |                      |       |       |       | -19.4 | -18.6 | -15.4 | -15.1 | -14.8 | -14.5 | -10.0 |
|                     | G2<br><i>T-shap.</i> |       |       |       | Cc i  | Cc o  | Sc i  | Sh o  | Sc o  | Ch o  | Sp o  |
|                     |                      |       |       |       | -20.0 | -19.2 | -18.8 | -18.7 | -18.2 | -17.8 | -11.1 |
|                     | G3<br><i>stacked</i> |       |       |       | Cc i  | Sc i  | Cc o  | Sc o  | Ch o  | Sh o  | Sp o  |
|                     |                      |       |       |       | -19.4 | -15.2 | -15.1 | -14.1 | -13.0 | -12.0 | -11.7 |
|                     | I2<br><i>T-shap.</i> | Cc i  | Sc i  | Ch i  | Sh i  | Sp i  | Cc o  | Sc o  | Sh o  | Ch o  | Sp o  |
|                     |                      | -21.4 | -20.7 | -20.1 | -19.6 | -19.1 | -17.7 | -17.3 | -16.6 | -15.8 | -10.4 |
|                     | I5<br><i>stacked</i> | Ch i  | Sp i  | Cc i  | Sh i  | Sc i  | Cc o  | Sc o  | Ch o  | Sh o  | Sp o  |
|                     |                      | -21.8 | -20.9 | -20.6 | -20.5 | -18.4 | -15.5 | -14.8 | -13.0 | -12.2 | -12.0 |

**Table ESI 3.** Ionization potential and HOMO energies (in atomic units) of the fragments of the cation- $\pi$  complexes studied, computed at the PBE/aVDZ level of calculation. These values are used in the SAPT(DFT) calculations.

|                     | Ioniz. Pot. | HOMO      |
|---------------------|-------------|-----------|
| Corannulene         | 0.287281    | -0.207502 |
| Sumanene            | 0.262624    | -0.190759 |
| Sodium              | 1.832202    | -1.332328 |
| Potassium           | 1.162489    | -0.914581 |
| Ammonium            | 0.974144    | -0.769845 |
| Tetramethylammonium | 0.638598    | -0.520627 |
| Guanidinium         | 0.583778    | -0.448164 |
| Imidazolium         | 0.563126    | -0.435742 |

**Note on the acronyms used.** The positions (ring and side) of the  $\pi$ -system (C = corannulene; S = sumanene) explored in the study are defined in Fig. 1 of the main text. Cations (in general, M) are symbolized by a letter: N = Na<sup>+</sup>, K = K<sup>+</sup>, A = ammonium, T = tetramethylammonium, G = guanidinium and I = imidazolium. The orientations by which the polyatomic cations (A, T, G and I) face the molecular bowl (in general, Mb) are defined in Fig. 2 of the main text, and are represented by a number. The acronym that identifies a particular cation- $\pi$  complex is formed combining the position of the Mb with the cation information. *Examples:*

**CcNi** = complex formed between Corannulene by its central ring with the Na<sup>+</sup> cation by the innner face of the Mb.

**ShA3o** = complex formed between Sumanene by its lateral hexagonal ring with the Ammonium cation with three (3) hydrogen groups oriented to the Mb and by its outer side.

**Table ESI 4.** Interaction energies and their contributions (all in kcal/mol) for the **Coranulenne-cation** complexes studied. The SAPT(DFT)/aVDZ calculations were made at the Mb...M distance of the minima found in the MP2.X scans.

| <i>compl.</i> | Eint   | Rep   | Elec   | Pol    | Disp   |
|---------------|--------|-------|--------|--------|--------|
| CcNi          | -25.11 | 6.59  | -8.01  | -22.97 | -0.72  |
| ChNi          | -24.75 | 7.60  | -9.11  | -22.57 | -0.68  |
| CcNo          | -27.27 | 7.18  | -11.80 | -22.08 | -0.57  |
| ChNo          | -26.66 | 7.76  | -11.78 | -22.08 | -0.58  |
| CcKi          | -23.22 | 11.28 | -9.49  | -19.48 | -5.53  |
| ChKi          | -21.82 | 10.64 | -9.68  | -18.02 | -4.76  |
| CcKo          | -22.35 | 9.52  | -12.06 | -16.38 | -3.43  |
| ChKo          | -21.54 | 9.80  | -11.48 | -16.41 | -3.44  |
| CcAli         | -22.31 | 15.67 | -9.01  | -20.42 | -8.55  |
| CcA1o         | -21.09 | 10.82 | -10.35 | -16.60 | -4.96  |
| ChA1o         | -20.49 | 11.35 | -9.90  | -16.80 | -5.14  |
| CcA2i         | -23.61 | 16.68 | -9.94  | -21.12 | -9.22  |
| CcA2o         | -22.34 | 13.56 | -12.49 | -17.67 | -5.74  |
| ChA2o         | -21.79 | 14.59 | -12.11 | -18.43 | -5.84  |
| CcA3i         | -24.22 | 15.68 | -10.28 | -20.36 | -9.27  |
| CcA3o         | -21.59 | 11.35 | -12.35 | -15.32 | -5.28  |
| ChA3o         | -20.21 | 11.11 | -11.04 | -15.11 | -5.16  |
| CcT1i         | -12.48 | 14.76 | -7.58  | -7.07  | -12.59 |
| CcT1o         | -10.94 | 7.21  | -7.73  | -4.71  | -5.71  |
| ChT1o         | -9.75  | 6.77  | -6.45  | -4.68  | -5.38  |
| CcT2i         | -13.31 | 17.28 | -9.22  | -7.80  | -13.57 |
| CcT2o         | -12.81 | 8.25  | -8.89  | -5.20  | -6.96  |
| ChT2o         | -10.87 | 8.02  | -7.29  | -5.19  | -6.41  |
| CcT3i         | -13.06 | 18.28 | -9.27  | -7.98  | -14.09 |
| CcT3o         | -13.84 | 10.28 | -9.60  | -6.58  | -7.94  |
| ChT3o         | -11.93 | 8.64  | -7.45  | -6.13  | -7.00  |
| CcG1i         | -14.72 | 14.59 | -7.74  | -10.80 | -10.78 |
| CcG1o         | -13.45 | 9.59  | -9.13  | -8.10  | -5.81  |
| ChG1o         | -12.76 | 9.30  | -8.26  | -8.25  | -5.54  |
| CcG2i         | -14.79 | 20.93 | -9.28  | -13.13 | -13.30 |
| CcG2o         | -17.12 | 12.92 | -10.61 | -11.98 | -7.45  |
| ChG2o         | -15.85 | 11.56 | -9.55  | -11.25 | -6.61  |
| CcG3i         | -15.40 | 19.51 | -11.84 | -8.70  | -14.37 |
| CcG3o         | -13.79 | 8.39  | -10.01 | -4.88  | -7.29  |
| ChG3o         | -11.78 | 7.95  | -7.89  | -5.05  | -6.78  |
| CcI2i         | -16.85 | 17.81 | -9.00  | -13.29 | -12.36 |
| ChI2i         | -16.12 | 14.53 | -7.70  | -11.86 | -11.08 |
| CcI2o         | -16.02 | 10.39 | -10.02 | -9.80  | -6.59  |
| ChI2o         | -14.25 | 9.51  | -8.66  | -9.27  | -5.83  |
| CcI5i         | -16.36 | 22.36 | -12.28 | -9.50  | -16.93 |
| ChI5i         | -17.52 | 20.66 | -11.66 | -10.75 | -15.76 |
| CcI5o         | -14.34 | 8.61  | -10.00 | -5.22  | -7.73  |
| ChI5o         | -12.10 | 7.14  | -7.71  | -4.93  | -6.60  |

**Table ESI 5.** Interaction energies and their contributions (all in kcal/mol) for the **Sumanene-cation** complexes studied. The SAPT(DFT)/aVDZ calculations were made at the Mb...M distance of the minima found in the MP2.X scans.

| <i>compl.</i> | Eint   | Rep   | Elec   | Pol    | Disp   |
|---------------|--------|-------|--------|--------|--------|
| ScNi          | -25.23 | 8.27  | -7.41  | -25.22 | -0.87  |
| ShNi          | -24.25 | 8.89  | -8.91  | -23.48 | -0.75  |
| SpNi          | -23.57 | 7.83  | -7.03  | -23.61 | -0.76  |
| ScNo          | -26.81 | 7.68  | -10.30 | -23.50 | -0.69  |
| ShNo          | -28.26 | 9.10  | -14.35 | -22.37 | -0.64  |
| SpNo          | -21.41 | 7.87  | -5.87  | -22.80 | -0.60  |
| ScKi          | -23.01 | 13.92 | -9.06  | -21.48 | -6.39  |
| ShKi          | -21.09 | 11.35 | -8.73  | -18.65 | -5.06  |
| SpKi          | -21.03 | 11.50 | -8.09  | -19.16 | -5.29  |
| ScKo          | -22.14 | 9.65  | -10.97 | -17.12 | -3.71  |
| ShKo          | -22.74 | 10.27 | -13.08 | -16.40 | -3.53  |
| SpKo          | -17.00 | 8.95  | -6.43  | -16.22 | -3.30  |
| ScAli         | -22.49 | 17.00 | -8.69  | -21.38 | -9.41  |
| ScA1o         | -20.36 | 9.92  | -9.09  | -16.15 | -5.04  |
| ShA1o         | -21.60 | 11.75 | -11.33 | -16.77 | -5.25  |
| SpA1o         | -16.36 | 10.35 | -5.62  | -16.23 | -4.86  |
| ScA2i         | -23.33 | 18.11 | -9.01  | -22.40 | -10.02 |
| ScA2o         | -22.31 | 13.17 | -11.33 | -18.22 | -5.93  |
| ShA2o         | -22.74 | 14.82 | -13.35 | -18.28 | -5.93  |
| SpA2o         | -15.60 | 11.17 | -5.19  | -16.62 | -4.97  |
| ScA3i         | -25.22 | 19.49 | -11.01 | -22.96 | -10.75 |
| ScA3o         | -22.08 | 12.19 | -11.82 | -16.74 | -5.71  |
| ShA3o         | -21.48 | 12.34 | -12.87 | -15.56 | -5.40  |
| SpA3o         | -16.35 | 10.41 | -6.90  | -14.86 | -5.00  |
| ScT1i         | -12.05 | 19.03 | -7.90  | -8.17  | -15.00 |
| ScT1o         | -10.80 | 7.37  | -7.29  | -4.97  | -5.90  |
| ShT1o         | -9.87  | 7.40  | -6.89  | -4.87  | -5.51  |
| SpT1o         | -8.06  | 6.40  | -4.71  | -4.54  | -5.21  |
| ScT2i         | -11.78 | 20.41 | -8.37  | -8.76  | -15.06 |
| ScT2o         | -12.45 | 8.87  | -8.54  | -5.57  | -7.20  |
| ShT2o         | -10.98 | 8.30  | -7.50  | -5.30  | -6.47  |
| SpT2o         | -8.22  | 6.27  | -4.62  | -4.59  | -5.27  |
| ScT3i         | -11.86 | 21.68 | -9.67  | -8.68  | -15.18 |
| ScT3o         | -13.47 | 10.47 | -9.30  | -6.77  | -7.87  |
| ShT3o         | -12.07 | 10.25 | -8.35  | -6.59  | -7.37  |
| SpT3o         | -10.45 | 10.14 | -6.44  | -6.46  | -7.69  |
| ScG1i         | -14.21 | 16.84 | -6.99  | -11.87 | -12.19 |
| ScG1o         | -13.39 | 8.83  | -8.22  | -8.18  | -5.82  |
| ShG1o         | -13.32 | 9.62  | -8.99  | -8.31  | -5.64  |
| SpG1o         | -8.77  | 6.54  | -3.51  | -7.24  | -4.56  |
| ScG2i         | -14.30 | 18.75 | -7.52  | -12.52 | -13.01 |
| ScG2o         | -16.37 | 12.60 | -9.71  | -11.80 | -7.45  |
| ShG2o         | -16.59 | 14.24 | -11.17 | -12.26 | -7.39  |
| SpG2o         | -9.74  | 7.23  | -3.49  | -8.68  | -4.80  |
| ScG3i         | -11.74 | 20.72 | -9.14  | -8.93  | -14.39 |
| ScG3o         | -13.14 | 7.60  | -8.97  | -4.91  | -6.86  |
| ShG3o         | -10.99 | 7.18  | -7.08  | -4.84  | -6.26  |
| SpG3o         | -10.41 | 7.91  | -6.26  | -5.28  | -6.78  |
| ScI2i         | -16.09 | 19.49 | -8.09  | -13.90 | -13.60 |
| ShI2i         | -15.53 | 16.47 | -6.85  | -12.49 | -12.66 |
| SpI2i         | -14.82 | 15.98 | -5.71  | -12.33 | -12.76 |
| ScI2o         | -15.77 | 10.84 | -9.44  | -10.30 | -6.87  |
| ShI2o         | -15.00 | 10.63 | -9.70  | -9.70  | -6.23  |
| SpI2o         | -9.28  | 6.09  | -3.58  | -7.51  | -4.28  |
| ScI5i         | -14.08 | 25.64 | -10.78 | -10.81 | -18.13 |
| ShI5i         | -16.02 | 22.66 | -9.74  | -12.32 | -16.62 |
| SpI5i         | -16.11 | 25.93 | -11.40 | -12.86 | -17.77 |
| ScI5o         | -13.85 | 8.71  | -9.39  | -5.38  | -7.80  |
| ShI5o         | -11.46 | 6.99  | -7.05  | -4.95  | -6.45  |
| SpI5o         | -10.91 | 7.68  | -6.93  | -5.17  | -6.50  |

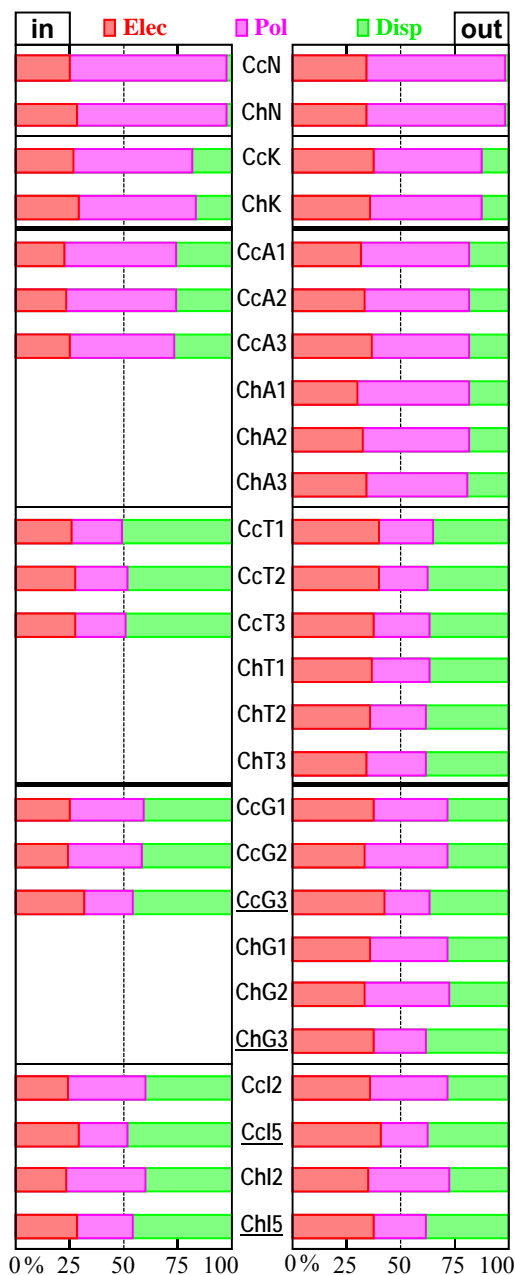

**Fig. ESI 2.** Relative contributions (expressed in %) of Electrostatic, Polarization and Dispersion to the stabilization of the **Corannulene-cation** complexes studied. Labels of the complexes in stacked configuration appear underlined.

The values of relative contributions to the stability of one complex are calculated using the data of Tables ESI 4 and ESI 5:

$$\%Elec = \frac{Elec \cdot 100\%}{Elec + Pol + Disp}$$

and similar with %Pol and %Disp.

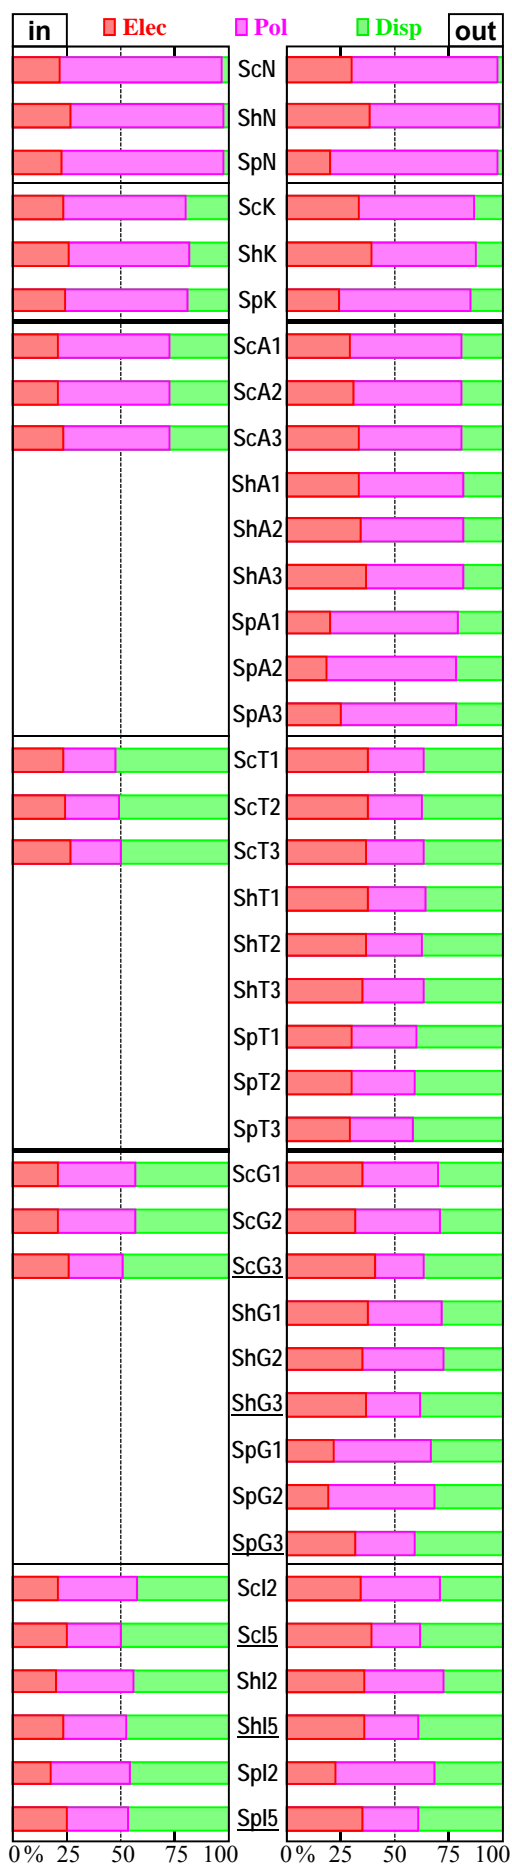

**Fig. ESI 3.** The same as Fig. ESI 2, here for the **Sumanene-cation** complexes.

**Table ESI 6.** Interaction energies of selected complexes, computed in the minima of the MP2.X scans.  
Molecular Bowl: sumanene, central ring.

| <b>Cation/orientation</b> | <b>Level*</b> | <b>in</b> | <b>out</b> |
|---------------------------|---------------|-----------|------------|
| N                         | <i>X</i>      | -28.95    | -27.74     |
|                           | <i>M</i>      | -32.51    | -30.70     |
|                           | <i>P</i>      | -28.50    | -29.90     |
| K                         | <i>X</i>      | -27.19    | -23.10     |
|                           | <i>M</i>      | -27.40    | -23.73     |
|                           | <i>P</i>      | -20.48    | -21.49     |
| A3                        | <i>X</i>      | -30.86    | -23.81     |
|                           | <i>M</i>      | -31.20    | -24.47     |
|                           | <i>P</i>      | -22.89    | -21.81     |
| T3                        | <i>X</i>      | -15.71    | -14.72     |
|                           | <i>M</i>      | -14.79    | -13.56     |
|                           | <i>P</i>      | -5.23     | -10.76     |
| G1                        | <i>X</i>      | -18.59    | -14.79     |
|                           | <i>M</i>      | -18.14    | -14.62     |
|                           | <i>P</i>      | -9.73     | -12.23     |
| G3                        | <i>X</i>      | -15.20    | -14.12     |
|                           | <i>M</i>      | -15.10    | -13.80     |
|                           | <i>P</i>      | -5.15     | -9.74      |
| I2                        | <i>X</i>      | -20.66    | -17.28     |
|                           | <i>M</i>      | -19.84    | -16.79     |
|                           | <i>P</i>      | -10.96    | -14.29     |
| I5                        | <i>X</i>      | -18.45    | -14.85     |
|                           | <i>M</i>      | -18.75    | -14.44     |
|                           | <i>P</i>      | -5.94     | -9.81      |

\*Level of calculation: *X* = MP2.X; *M* = M062X/6-31+G\*; *P* = PBE/6-31+G\*

Cartesian coordinates of the polyatomic fragments used in the study  
 optimization + frequencies computed at the level of calculation: M06-2X/6-31+G\*

**C<sub>20</sub>H<sub>10</sub> = Corannulene, C5v**

|   |             |             |             |
|---|-------------|-------------|-------------|
| C | -1.14681132 | -0.37262104 | 0.63005922  |
| C | 0.00000030  | -1.20582856 | 0.63005925  |
| C | 1.14681102  | -0.37262180 | 0.63005925  |
| C | 0.70876786  | 0.97553614  | 0.63005922  |
| C | -0.70876852 | 0.97553617  | 0.63005921  |
| C | -1.45670056 | 2.00497631  | 0.09801119  |
| C | -2.81097051 | 1.64060583  | -0.25948582 |
| C | -3.23844597 | 0.32496873  | -0.25948581 |
| C | -2.35699113 | -0.76583262 | 0.09801122  |
| C | -2.42894668 | -2.16641682 | -0.25948576 |
| C | -1.30979850 | -2.97952484 | -0.25948574 |
| C | 0.00000026  | -2.47828642 | 0.09801127  |
| C | 1.30979922  | -2.97952496 | -0.25948571 |
| C | 2.42894641  | -2.16641693 | -0.25948571 |
| C | 2.35699037  | -0.76583287 | 0.09801127  |
| C | 3.23844651  | 0.32496858  | -0.25948574 |
| C | 2.81097064  | 1.64060595  | -0.25948576 |
| C | 1.45670042  | 2.00497648  | 0.09801122  |
| C | 0.69167121  | 3.18036601  | -0.25948581 |
| C | -0.69167121 | 3.18036690  | -0.25948582 |
| H | -1.21035420 | 4.06266083  | -0.62729684 |
| H | -3.48980004 | 2.40654649  | -0.62729684 |
| H | -4.23784051 | 0.10431530  | -0.62729681 |
| H | -3.36716918 | -2.57533327 | -0.62729677 |
| H | -1.40877467 | -3.99819039 | -0.62729673 |
| H | 1.40877526  | -3.99819002 | -0.62729670 |
| H | 3.36716917  | -2.57533356 | -0.62729670 |
| H | 4.23784034  | 0.10431556  | -0.62729673 |
| H | 3.48979998  | 2.40654644  | -0.62729677 |
| H | 1.21035499  | 4.06266103  | -0.62729681 |

**NH<sub>4</sub><sup>+</sup> = Ammonium cation, Td**

|   |             |             |             |
|---|-------------|-------------|-------------|
| N | 0.00000000  | 0.00000000  | 0.00000000  |
| H | 0.00000000  | 0.00000000  | 1.02829432  |
| H | 0.96948518  | 0.00000000  | -0.34276477 |
| H | -0.48474260 | 0.83959879  | -0.34276477 |
| H | -0.48474259 | -0.83959880 | -0.34276477 |

**C<sub>4</sub>H<sub>12</sub>N<sup>+</sup> = Tetramethylammonium cation, Td**

|   |             |             |             |
|---|-------------|-------------|-------------|
| N | 0.00000000  | 0.00000000  | 0.00000000  |
| C | 1.49852706  | 0.00000000  | 0.00000000  |
| C | -0.49950902 | -1.22354222 | 0.70641243  |
| C | -0.49950902 | -0.00000000 | -1.41282486 |
| C | -0.49950902 | 1.22354222  | 0.70641243  |
| H | 1.95971433  | 0.00000000  | 0.98901930  |
| H | 1.95971433  | -0.85651584 | -0.49450965 |
| H | 1.95971433  | 0.85651584  | -0.49450965 |
| H | -0.18700994 | -1.31459477 | 1.74800095  |
| H | -1.58569445 | -1.31459477 | 0.75898165  |
| H | -0.18700994 | -2.17111061 | 0.26447200  |
| H | -1.58569445 | -0.00000000 | -1.51796329 |
| H | -0.18700994 | 0.85651584  | -2.01247294 |
| H | -0.18700994 | -0.85651584 | -2.01247294 |
| H | -0.18700994 | 2.17111061  | 0.26447199  |
| H | -1.58569445 | 1.31459477  | 0.75898165  |
| H | -0.18700994 | 1.31459477  | 1.74800095  |

**C<sub>21</sub>H<sub>12</sub> = Sumanene, C3v**

|   |             |             |             |
|---|-------------|-------------|-------------|
| C | 0.69117819  | -1.22833915 | -0.69998887 |
| C | -0.69117746 | -1.22833925 | -0.69998889 |
| C | -1.40936173 | 0.01559176  | -0.69998889 |
| C | -0.71818436 | 1.21274712  | -0.69998887 |
| C | 0.71818436  | 1.21274785  | -0.69998884 |
| C | 1.40936262  | 0.01559260  | -0.69998884 |
| C | 2.64539924  | -0.13212532 | -0.06831382 |
| C | 2.85085915  | -1.64594370 | 0.18489616  |
| C | 1.43712444  | -2.22491944 | -0.06831387 |
| C | 0.71411463  | -3.30021949 | 0.45185711  |
| C | -0.71411310 | -3.30022080 | 0.45185708  |
| C | -1.43712375 | -2.22492018 | -0.06831392 |
| C | -2.85085917 | -1.64594515 | 0.18489606  |
| C | -2.64539921 | -0.13212676 | -0.06831392 |
| C | -3.21513206 | 1.03166889  | 0.45185708  |
| C | -2.50101760 | 2.26855004  | 0.45185711  |
| C | -1.20827558 | 2.35704545  | -0.06831387 |
| C | -0.00000095 | 3.29188830  | 0.18489616  |
| C | 1.20827469  | 2.35704614  | -0.06831382 |
| C | 2.50101682  | 2.26855140  | 0.45185720  |
| C | 3.21513109  | 1.03166983  | 0.45185720  |
| H | 4.16042959  | 0.99672100  | 0.98847121  |
| H | 3.18882078  | -1.84106632 | 1.20671417  |
| H | 3.59682417  | -2.07662667 | -0.49568583 |
| H | 1.21703102  | -4.10139783 | 0.98847111  |
| H | -1.21702966 | -4.10139761 | 0.98847107  |
| H | -3.18882036 | -1.84106724 | 1.20671406  |
| H | -3.59682303 | -2.07662781 | -0.49568595 |
| H | -4.16042979 | 0.99671836  | 0.98847107  |
| H | -2.94340058 | 3.10467739  | 0.98847111  |
| H | -0.00000144 | 3.68213296  | 1.20671417  |
| H | -0.00000121 | 4.15325444  | -0.49568583 |
| H | 2.94339912  | 3.10467852  | 0.98847121  |

**CH<sub>5</sub>N<sub>3</sub><sup>+</sup> = Guanidinium cation, C3**

|   |             |             |             |
|---|-------------|-------------|-------------|
| C | 0.00000000  | 0.00000000  | 0.00000000  |
| N | 0.00000000  | 0.00000000  | 1.33259541  |
| N | 1.15406206  | 0.00000000  | -0.66629598 |
| N | -1.15405782 | -0.00312600 | -0.66629598 |
| H | -1.19021509 | -0.20083352 | -1.65782873 |
| H | -2.03221182 | 0.19342044  | -0.20395746 |
| H | -0.84034614 | -0.19760886 | 1.86013720  |
| H | 0.83920536  | 0.19892436  | 1.86146692  |
| H | 2.03136541  | -0.19533190 | -0.20184417 |
| H | 1.19220876  | 0.19665048  | -1.65796901 |

**C<sub>3</sub>H<sub>5</sub>N<sub>2</sub><sup>+</sup> = Imidazolium cation, C2v**

|   |             |             |            |
|---|-------------|-------------|------------|
| C | 0.00598162  | 0.76338267  | 2.76894399 |
| N | -1.07470959 | 0.09187609  | 3.15925224 |
| C | -0.70160801 | -1.05633494 | 3.82664158 |
| C | 0.65842025  | -1.07167526 | 3.83555810 |
| N | 1.06604223  | 0.06772966  | 3.17328730 |
| H | 0.02006885  | 1.69692224  | 2.22633090 |
| H | -2.02876475 | 0.38938239  | 2.98632881 |
| H | -1.42100895 | -1.75100181 | 4.23041160 |
| H | 1.35661468  | -1.78233179 | 4.24862208 |
| H | 2.02874995  | 0.34361599  | 3.01293043 |
